# Supplementary material for: Methylation-associated inactivation of JPH3 and its effect on prognosis and cell biological function in HCC
Source: PubMed Central journal article supplement — Mol Med Rep. 2022 Feb 14;25(4):124. doi: 10.3892/mmr.2022.12640 (PMC8864618; doi:10.3892/mmr.2022.12640), 2022-02-14

Figure S1. Restoration of JPH3 expression via plasmid can inhibit cell proliferation and promote apoptosis in HCC. (A) Flow cytometric apoptosis detection was used to analyze the effect of restoration of JPH3 expression on the apoptosis of the Hep3B cell line. (B) Flow cytometric apoptosis detection was used to analyze the effect of restoration of JPH3 expression on the apoptosis of the Huh-7 cell line. (C) Flow cytometric detection was used to analyze the effect of restoration of JPH3 expression on cell cycle distribution of the Hep3B cell line. (D) Flow cytometry detection was used to analyze the effect of restoration of JPH3 expression on cell cycle distribution of the Huh-7 cell line. \* $P < 0.05$ , \*\* $P < 0.01$ . HCC, hepatocellular carcinoma; JPH3, junctophilin 3.

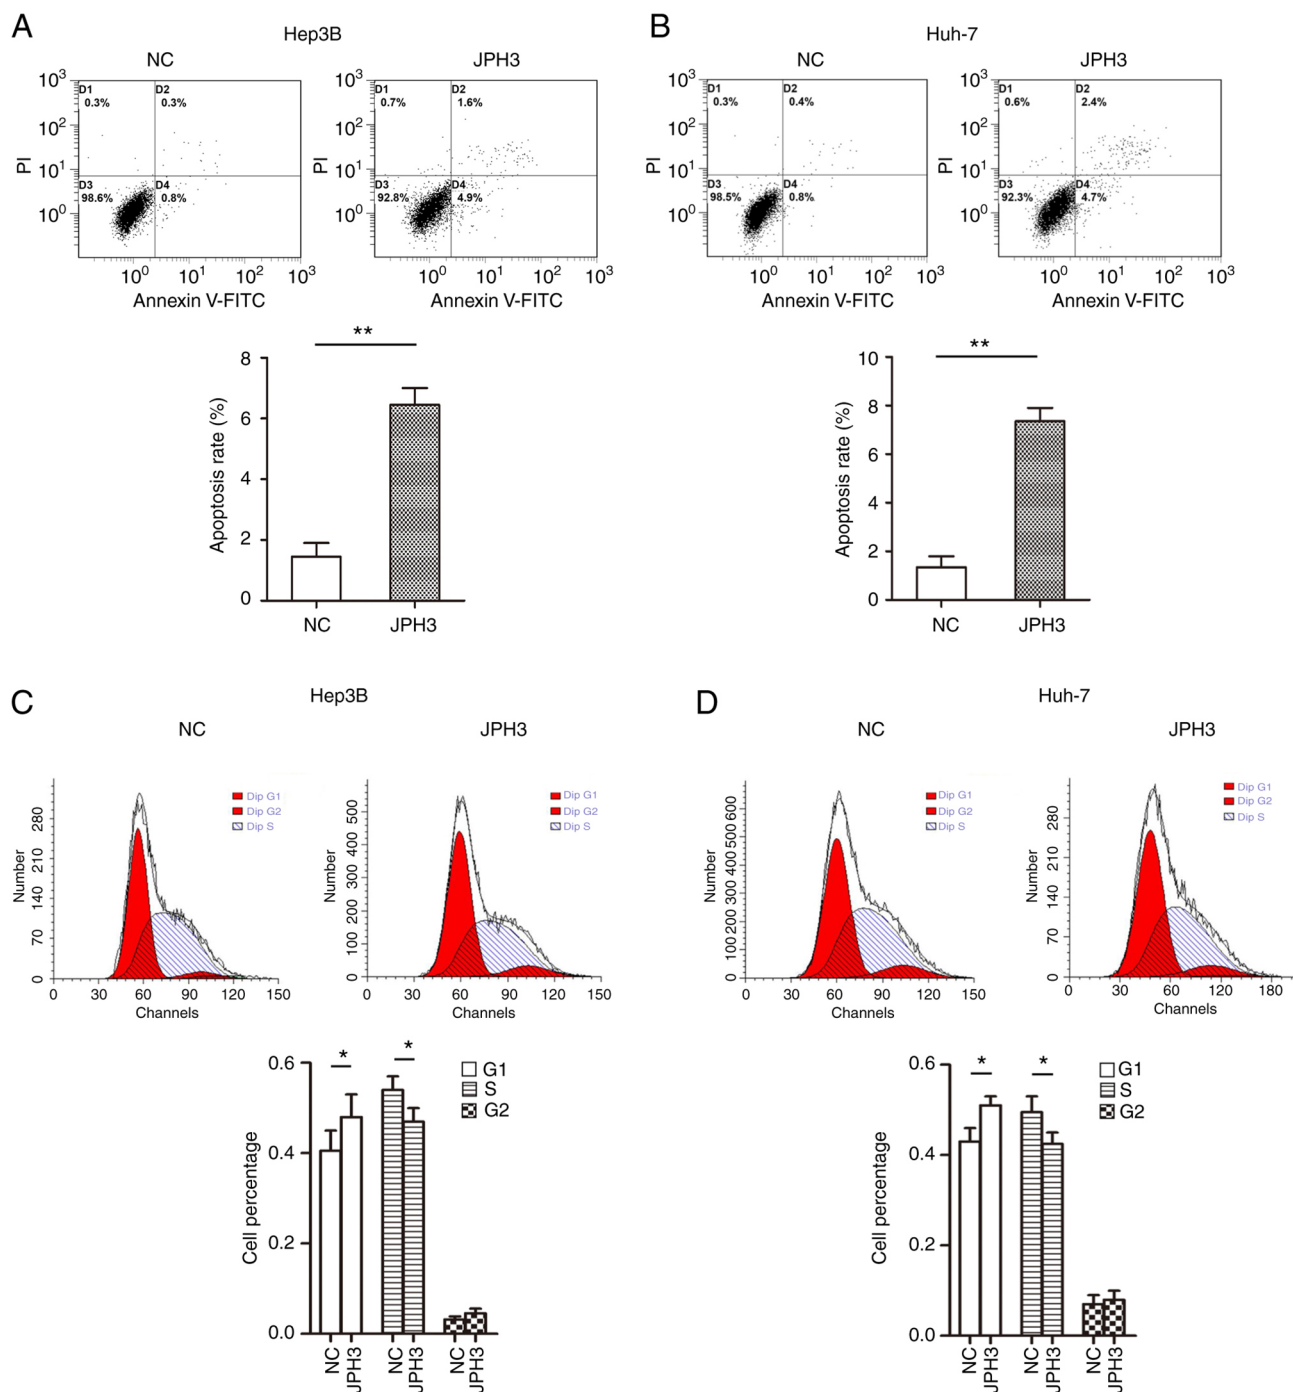

Figure S2. Effect of restoration of JPH3 expression via plasmid on EMT in HCC. (A) Western blotting was used to analyze the protein expression of JPH3, E-cadherin, N-cadherin, vimentin and Ki-67 in the Hep3B cell line after increasing the expression of JPH3. (B) Western blotting was used to analyze the protein expression of JPH3, E-cadherin, N-cadherin, vimentin and Ki-67 in the Huh-7 cell line after increasing the expression of JPH3. \*P<0.05. HCC, hepatocellular carcinoma; JPH3, junctophilin 3.

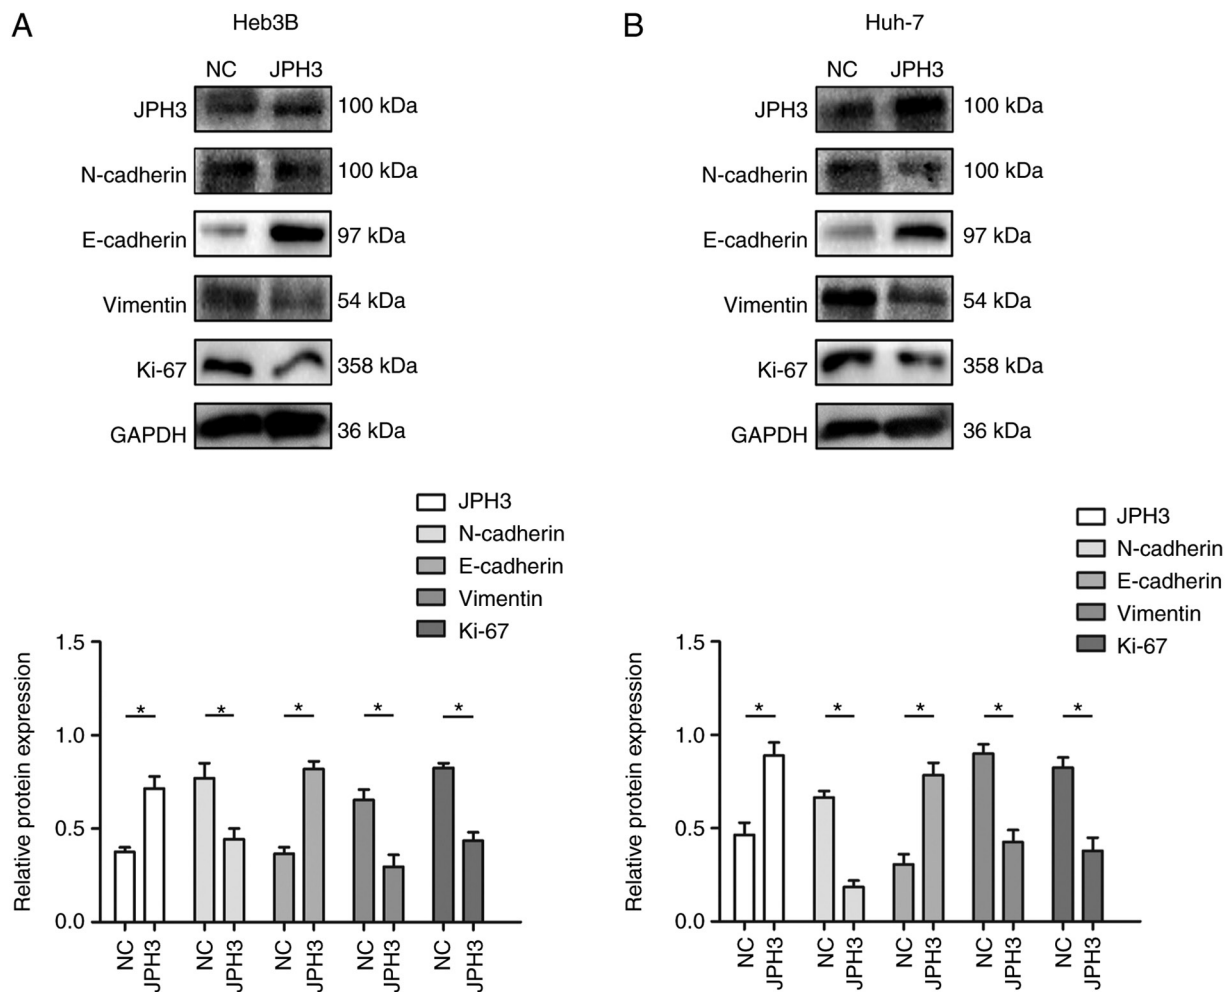

Supplement: Supplementary_Data.pdf [file Supplementary_Data.pdf]
